# Supplementary material
Source: publisher figshare collection journal article supplement (https://acs.figshare.com/ndownloader/files/5179210)
Supplement: Supplementary file 1 [file 5179210]

## Electronic Supporting Information

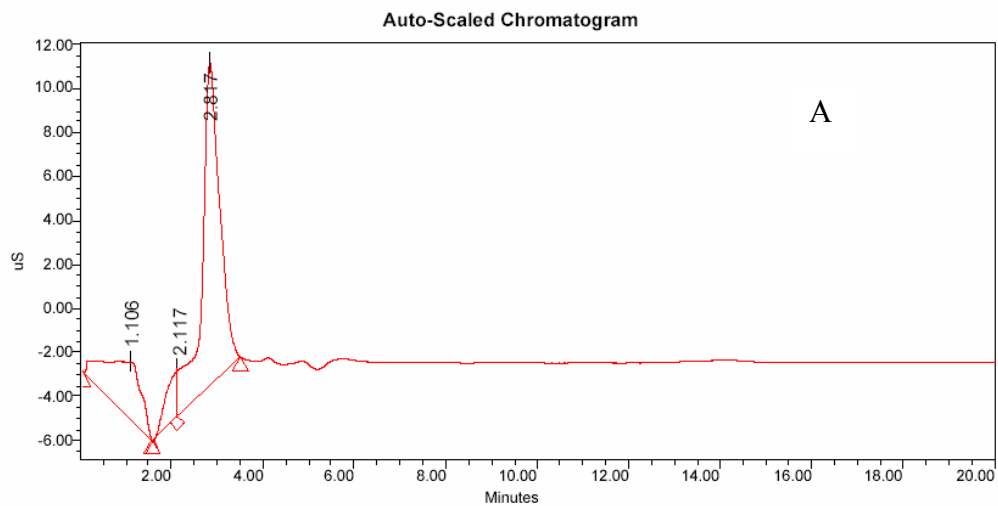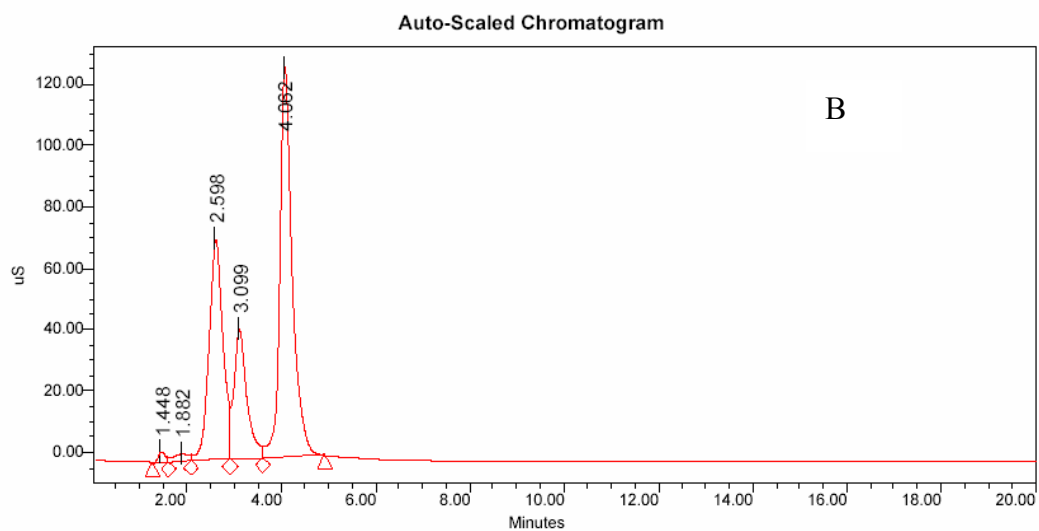

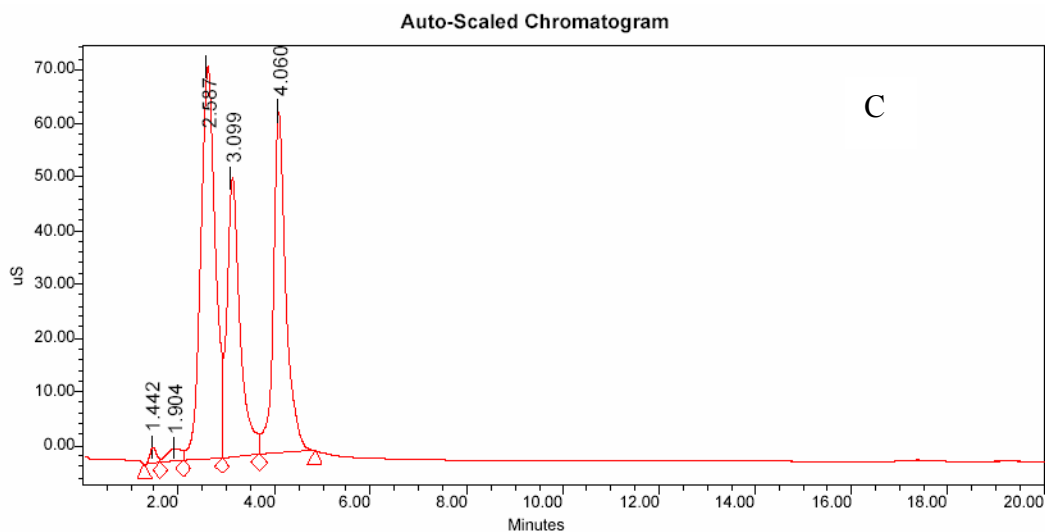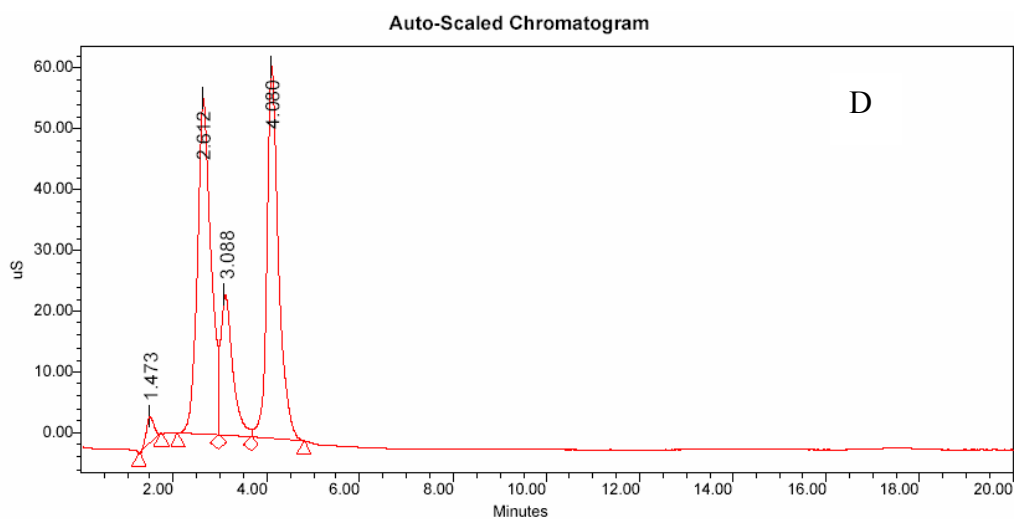

**Fig S1.** Ion chromatograms of (A) standard solution of sodium acetate (100ppm); (B) ruthenium organosol in ethylene glycol; (C) platinum organosol in ethylene glycol; (D) mixture of standard solution of sodium acetate and platinum organosol in ethylene glycol, The three major peaks in (B), (C) and (D) from the left to the right correspond to acetate, ethylene glycol, and chloride respectively (after comparison with the respective standard samples).
